# Supplementary material
Source: PubMed Central journal article supplement (PMC7039402)
Supplement: NIHMS1540406-supplement-13524_2019_813_MOESM1_ESM.pdf [file NIHMS1540406-supplement-13524_2019_813_MOESM1_ESM.pdf]

## Online Appendix

**Table A1** Descriptive statistics by gender composition of the couple for partnered bisexuals, NHIS 2013–2017 (*N* = 421)

|                                         | Same-gender union |      | Different-gender union |      |
|-----------------------------------------|-------------------|------|------------------------|------|
|                                         | Mean/%            | SD   | Mean/%                 | SD   |
| Self-rated health                       |                   |      |                        |      |
| Mean                                    | 3.7               | 1.1  | 3.4                    | 1.1  |
| Functional limitation                   |                   |      |                        |      |
| Mean                                    | 0.7               | 1.7  | 1.7                    | 2.9  |
| Education (%)                           |                   |      |                        |      |
| Less than high school                   | 9.1               |      | 9.2                    |      |
| High school or equivalent               | 10.2              |      | 21.8                   |      |
| Some college                            | 23.9              |      | 35.3                   |      |
| Bachelor's degree or above              | 56.8              |      | 33.7                   |      |
| Income (\$1,000s)                       |                   |      |                        |      |
| Mean                                    | 96.7              | 59.0 | 66.9                   | 50.2 |
| Employment status (%)                   |                   |      |                        |      |
| Working/schooling                       | 87.1              |      | 68.5                   |      |
| Unemployed/unable to work               | 7.3               |      | 26.8                   |      |
| Retired                                 | 5.5               |      | 4.7                    |      |
| Perceived financial strain              |                   |      |                        |      |
| Mean                                    | 2.2               | 0.7  | 2.3                    | 0.8  |
| Current smoker (%)                      | 13.1              |      | 25.5                   |      |
| Alcohol consumption (%)                 |                   |      |                        |      |
| Not a current drinker                   | 18.3              |      | 18.7                   |      |
| Drinker, 1-2 drinks per day of drinking | 63.3              |      | 52.4                   |      |
| Drinker, 3+ drinks per day of drinking  | 18.4              |      | 28.9                   |      |
| Vigorous exercise 2+ times per week (%) | 60.7              |      | 39.1                   |      |
| Cohabiting rather than married (%)      | 65.1              |      | 38.8                   |      |
| Female (%)                              | 88.4              |      | 73.0                   |      |
| Age                                     |                   |      |                        |      |
| Mean                                    | 42.8              | 13.6 | 37.0                   | 14.1 |
| Race (%)                                |                   |      |                        |      |
| White                                   | 90.5              |      | 84.8                   |      |
| Black                                   | 3.5               |      | 6.6                    |      |
| Asian and others                        | 6.0               |      | 8.6                    |      |
| Hispanic (%)                            | 24.0              |      | 11.2                   |      |
| Region (%)                              |                   |      |                        |      |
| Northeast                               | 6.3               |      | 21.1                   |      |
| Midwest                                 | 25.5              |      | 24.4                   |      |
| South                                   | 42.9              |      | 27.2                   |      |
| West                                    | 25.3              |      | 27.2                   |      |
| <b>N</b>                                | <b>48</b>         |      | <b>373</b>             |      |
